# Supplementary material
Source: HighWire-hosted journal article supplement (https://erj.ersjournals.com/content/56/6/1902144)
Supplement: inline-supplementary-material-1 [file inline-supplementary-material-1.pdf]

**Supplementary Table S1.** Prevalence and 95% CI of *asthma* as primary diagnosis from 1966 to 2017, and all diagnoses from 1997 to 2017.

| <b>Year</b> | <b>Primary diagnosis %</b> | <b>95% CI</b> | <b>All diagnoses %</b> | <b>95% CI</b> |
|-------------|----------------------------|---------------|------------------------|---------------|
| 1966        | <b>0,29</b>                | 0,22-0,36     |                        |               |
| 1967        | <b>0,32</b>                | 0,25-0,39     |                        |               |
| 1968        | <b>0,42</b>                | 0,34-0,50     |                        |               |
| 1969        | <b>0,44</b>                | 0,36-0,52     |                        |               |
| 1970        | <b>0,51</b>                | 0,42-0,60     |                        |               |
| 1971        | <b>0,58</b>                | 0,48-0,68     |                        |               |
| 1972        | <b>0,74</b>                | 0,63-0,85     |                        |               |
| 1973        | <b>0,75</b>                | 0,64-0,86     |                        |               |
| 1974        | <b>0,79</b>                | 0,68-0,90     |                        |               |
| 1975        | <b>0,93</b>                | 0,83-1,03     |                        |               |
| 1976        | <b>1,04</b>                | 0,93-1,15     |                        |               |
| 1977        | <b>0,94</b>                | 0,84-1,04     |                        |               |
| 1978        | <b>0,93</b>                | 0,83-1,03     |                        |               |
| 1979        | <b>1,08</b>                | 0,97-1,19     |                        |               |
| 1980        | <b>1,07</b>                | 0,96-1,18     |                        |               |
| 1981        | <b>1,14</b>                | 1,03-1,25     |                        |               |
| 1982        | <b>1,25</b>                | 1,13-1,37     |                        |               |
| 1983        | <b>1,52</b>                | 1,39-1,65     |                        |               |
| 1984        | <b>1,48</b>                | 1,35-1,61     |                        |               |
| 1985        | <b>1,61</b>                | 1,47-1,75     |                        |               |
| 1986        | <b>1,65</b>                | 1,51-1,79     |                        |               |
| 1987        | <b>1,84</b>                | 1,69-1,99     |                        |               |
| 1988        | <b>1,87</b>                | 1,71-2,03     |                        |               |
| 1989        | <b>1,79</b>                | 1,64-1,94     |                        |               |
| 1990        | <b>1,77</b>                | 1,63-1,90     |                        |               |
| 1991        | <b>1,78</b>                | 1,64-1,92     |                        |               |
| 1992        | <b>1,95</b>                | 1,80-2,10     |                        |               |
| 1993        | <b>2,02</b>                | 1,87-2,17     |                        |               |
| 1994        | <b>2,37</b>                | 2,21-2,53     |                        |               |
| 1995        | <b>2,54</b>                | 2,37-2,71     |                        |               |
| 1996        | <b>2,79</b>                | 2,61-2,97     |                        |               |
| 1997        | <b>2,65</b>                | 2,48-2,83     | <b>2,89</b>            | 2,71-3,07     |
| 1998        | <b>2,98</b>                | 2,80-3,17     | <b>3,24</b>            | 3,05-3,43     |
| 1999        | <b>3,18</b>                | 2,99-3,36     | <b>3,37</b>            | 3,18-3,57     |
| 2000        | <b>2,98</b>                | 2,80-3,16     | <b>3,39</b>            | 3,20-3,58     |
| 2001        | <b>3,44</b>                | 3,25-3,63     | <b>4,01</b>            | 3,81-4,22     |
| 2002        | <b>3,31</b>                | 3,12-3,50     | <b>3,90</b>            | 3,70-4,11     |
| 2003        | <b>3,45</b>                | 3,25-3,64     | <b>4,10</b>            | 3,89-4,31     |
| 2004        | <b>2,98</b>                | 2,79-3,16     | <b>3,95</b>            | 3,74-4,17     |
| 2005        | <b>2,99</b>                | 2,81-3,18     | <b>4,14</b>            | 3,92-4,36     |
| 2006        | <b>3,15</b>                | 2,96-3,34     | <b>4,49</b>            | 4,27-4,71     |

|      |             |           |             |           |
|------|-------------|-----------|-------------|-----------|
| 2007 | <b>3,12</b> | 2,94-3,31 | <b>4,51</b> | 4,29-4,73 |
| 2008 | <b>3,00</b> | 2,82-3,18 | <b>4,41</b> | 4,20-4,63 |
| 2009 | <b>3,31</b> | 3,12-3,49 | <b>4,86</b> | 4,63-5,09 |
| 2010 | <b>3,31</b> | 3,12-3,49 | <b>4,86</b> | 4,63-5,08 |
| 2011 | <b>3,52</b> | 3,33-3,72 | <b>5,27</b> | 5,04-5,51 |
| 2012 | <b>3,53</b> | 3,33-3,72 | <b>5,38</b> | 5,14-5,62 |
| 2013 | <b>3,31</b> | 3,12-3,50 | <b>4,96</b> | 4,73-5,19 |
| 2014 | <b>3,40</b> | 3,20-3,60 | <b>5,10</b> | 4,86-5,34 |
| 2015 | <b>3,16</b> | 2,97-3,35 | <b>4,81</b> | 4,57-5,05 |
| 2016 | <b>3,16</b> | 2,96-3,36 | <b>4,89</b> | 4,65-5,14 |
| 2017 | <b>3,34</b> | 3,13-3,54 | <b>5,19</b> | 4,94-5,44 |

**Supplementary Table S2.** Prevalence and 95% CI of *allergic rhinitis* as primary diagnosis from 1966 to 2017, and all diagnoses from 1997 to 2017.

| Year | Primary diagnosis % | 95% CI    | All diagnoses % | 95% CI |
|------|---------------------|-----------|-----------------|--------|
| 1966 | <b>0,06</b>         | 0,03-0,09 |                 |        |
| 1967 | <b>0,06</b>         | 0,03-0,09 |                 |        |
| 1968 | <b>0,07</b>         | 0,04-0,10 |                 |        |
| 1969 | <b>0,09</b>         | 0,05-0,13 |                 |        |
| 1970 | <b>0,31</b>         | 0,24-0,38 |                 |        |
| 1971 | <b>0,43</b>         | 0,35-0,51 |                 |        |
| 1972 | <b>0,62</b>         | 0,52-0,72 |                 |        |
| 1973 | <b>1,00</b>         | 0,87-1,13 |                 |        |
| 1974 | <b>1,28</b>         | 1,14-1,42 |                 |        |
| 1975 | <b>1,73</b>         | 1,60-1,86 |                 |        |
| 1976 | <b>1,80</b>         | 1,66-1,94 |                 |        |
| 1977 | <b>2,04</b>         | 1,89-2,19 |                 |        |
| 1978 | <b>2,54</b>         | 2,37-2,71 |                 |        |
| 1979 | <b>2,98</b>         | 2,80-3,16 |                 |        |
| 1980 | <b>2,88</b>         | 2,71-3,05 |                 |        |
| 1981 | <b>3,81</b>         | 3,61-4,01 |                 |        |
| 1982 | <b>3,90</b>         | 3,69-4,11 |                 |        |
| 1983 | <b>4,66</b>         | 4,43-4,89 |                 |        |
| 1984 | <b>4,16</b>         | 3,94-4,38 |                 |        |
| 1985 | <b>4,53</b>         | 4,30-4,76 |                 |        |
| 1986 | <b>4,99</b>         | 4,75-5,23 |                 |        |
| 1987 | <b>4,82</b>         | 4,58-5,06 |                 |        |
| 1988 | <b>4,82</b>         | 4,57-5,07 |                 |        |
| 1989 | <b>5,11</b>         | 4,86-5,36 |                 |        |
| 1990 | <b>4,82</b>         | 4,60-5,04 |                 |        |
| 1991 | <b>4,51</b>         | 4,29-4,74 |                 |        |
| 1992 | <b>4,90</b>         | 4,67-5,13 |                 |        |
| 1993 | <b>6,46</b>         | 6,20-6,72 |                 |        |

|      |             |           |              |             |
|------|-------------|-----------|--------------|-------------|
| 1994 | <b>6,40</b> | 6,14-6,65 |              |             |
| 1995 | <b>7,04</b> | 6,76-7,32 |              |             |
| 1996 | <b>7,94</b> | 7,65-8,23 |              |             |
| 1997 | <b>7,42</b> | 7,14-7,70 | <b>9,13</b>  | 8,82-9,44   |
| 1998 | <b>7,43</b> | 7,15-7,72 | <b>10,77</b> | 10,44-11,11 |
| 1999 | <b>7,60</b> | 7,32-7,88 | <b>9,64</b>  | 9,32-9,96   |
| 2000 | <b>8,88</b> | 8,58-9,18 | <b>10,84</b> | 10,52-11,17 |
| 2001 | <b>8,14</b> | 7,85-8,42 | <b>10,53</b> | 10,21-10,85 |
| 2002 | <b>8,25</b> | 7,96-8,54 | <b>10,77</b> | 10,44-11,09 |
| 2003 | <b>8,33</b> | 8,03-8,63 | <b>10,64</b> | 10,31-10,97 |
| 2004 | <b>6,56</b> | 6,29-6,83 | <b>9,52</b>  | 9,20-9,84   |
| 2005 | <b>6,93</b> | 6,65-7,21 | <b>10,17</b> | 9,83-10,50  |
| 2006 | <b>6,94</b> | 6,67-7,21 | <b>10,55</b> | 10,22-10,88 |
| 2007 | <b>6,22</b> | 5,96-6,48 | <b>9,66</b>  | 9,34-9,97   |
| 2008 | <b>5,40</b> | 5,17-5,64 | <b>8,57</b>  | 8,28-8,87   |
| 2009 | <b>5,92</b> | 5,68-6,17 | <b>9,56</b>  | 9,25-9,87   |
| 2010 | <b>5,87</b> | 5,63-6,12 | <b>9,91</b>  | 9,60-10,22  |
| 2011 | <b>6,56</b> | 6,30-6,83 | <b>10,97</b> | 10,64-11,30 |
| 2012 | <b>6,71</b> | 6,45-6,97 | <b>11,21</b> | 10,88-11,55 |
| 2013 | <b>6,27</b> | 6,01-6,53 | <b>10,73</b> | 10,39-11,06 |
| 2014 | <b>6,86</b> | 6,58-7,13 | <b>11,53</b> | 11,18-11,88 |
| 2015 | <b>5,89</b> | 5,63-6,15 | <b>10,37</b> | 10,03-10,70 |
| 2016 | <b>6,46</b> | 6,18-6,73 | <b>11,38</b> | 11,02-11,74 |
| 2017 | <b>5,90</b> | 5,63-6,16 | <b>10,70</b> | 10,35-11,04 |

**Supplementary Table S3.** Prevalence and 95% CI of *atopic eczema* as primary diagnosis from 1966 to 2017, and all diagnoses from 1997 to 2017.

| Year | Primary diagnosis % | 95% CI    | All diagnoses % | 95% CI |
|------|---------------------|-----------|-----------------|--------|
| 1966 | <b>0,15</b>         | 0,10-0,20 |                 |        |
| 1967 | <b>0,14</b>         | 0,09-0,19 |                 |        |
| 1968 | <b>0,20</b>         | 0,14-0,26 |                 |        |
| 1969 | <b>0,25</b>         | 0,19-0,31 |                 |        |
| 1970 | <b>0,39</b>         | 0,31-0,47 |                 |        |
| 1971 | <b>0,34</b>         | 0,27-0,41 |                 |        |
| 1972 | <b>0,68</b>         | 0,58-0,78 |                 |        |
| 1973 | <b>0,86</b>         | 0,74-0,98 |                 |        |
| 1974 | <b>1,01</b>         | 0,88-1,14 |                 |        |
| 1975 | <b>1,05</b>         | 0,95-1,15 |                 |        |
| 1976 | <b>0,88</b>         | 0,78-0,98 |                 |        |
| 1977 | <b>0,94</b>         | 0,84-1,04 |                 |        |
| 1978 | <b>1,08</b>         | 0,97-1,19 |                 |        |
| 1979 | <b>0,86</b>         | 0,76-0,96 |                 |        |
| 1980 | <b>1,07</b>         | 0,96-1,18 |                 |        |

|      |             |           |             |           |
|------|-------------|-----------|-------------|-----------|
| 1981 | <b>1,26</b> | 1,14-1,38 |             |           |
| 1982 | <b>1,18</b> | 1,07-1,29 |             |           |
| 1983 | <b>1,40</b> | 1,27-1,53 |             |           |
| 1984 | <b>1,36</b> | 1,24-1,48 |             |           |
| 1985 | <b>1,37</b> | 1,24-1,50 |             |           |
| 1986 | <b>1,34</b> | 1,22-1,46 |             |           |
| 1987 | <b>1,47</b> | 1,34-1,60 |             |           |
| 1988 | <b>1,43</b> | 1,29-1,57 |             |           |
| 1989 | <b>1,29</b> | 1,16-1,42 |             |           |
| 1990 | <b>1,21</b> | 1,10-1,32 |             |           |
| 1991 | <b>1,08</b> | 0,97-1,19 |             |           |
| 1992 | <b>1,36</b> | 1,24-1,48 |             |           |
| 1993 | <b>1,21</b> | 1,09-1,33 |             |           |
| 1994 | <b>1,17</b> | 1,06-1,28 |             |           |
| 1995 | <b>1,33</b> | 1,21-1,45 |             |           |
| 1996 | <b>1,21</b> | 1,09-1,33 |             |           |
| 1997 | <b>1,05</b> | 0,94-1,16 | <b>1,67</b> | 1,53-1,80 |
| 1998 | <b>1,15</b> | 1,04-1,26 | <b>2,03</b> | 1,88-2,18 |
| 1999 | <b>1,12</b> | 1,01-1,23 | <b>1,62</b> | 1,49-1,76 |
| 2000 | <b>1,17</b> | 1,06-1,28 | <b>1,70</b> | 1,57-1,84 |
| 2001 | <b>1,33</b> | 1,21-1,45 | <b>1,91</b> | 1,76-2,05 |
| 2002 | <b>1,25</b> | 1,13-1,37 | <b>1,88</b> | 1,73-2,02 |
| 2003 | <b>1,13</b> | 1,02-1,24 | <b>1,63</b> | 1,50-1,77 |
| 2004 | <b>0,98</b> | 0,87-1,09 | <b>1,70</b> | 1,56-1,84 |
| 2005 | <b>1,07</b> | 0,96-1,18 | <b>1,86</b> | 1,71-2,01 |
| 2006 | <b>1,11</b> | 1,00-1,22 | <b>1,94</b> | 1,79-2,09 |
| 2007 | <b>1,11</b> | 1,00-1,22 | <b>1,93</b> | 1,79-2,08 |
| 2008 | <b>1,19</b> | 1,08-1,30 | <b>2,09</b> | 1,94-2,24 |
| 2009 | <b>1,20</b> | 1,09-1,31 | <b>2,20</b> | 2,04-2,35 |
| 2010 | <b>1,24</b> | 1,12-1,36 | <b>2,21</b> | 2,06-2,36 |
| 2011 | <b>1,22</b> | 1,10-1,34 | <b>2,48</b> | 2,31-2,64 |
| 2012 | <b>1,30</b> | 1,18-1,42 | <b>2,50</b> | 2,33-2,66 |
| 2013 | <b>1,38</b> | 1,25-1,51 | <b>2,58</b> | 2,41-2,75 |
| 2014 | <b>1,28</b> | 1,16-1,40 | <b>2,47</b> | 2,30-2,64 |
| 2015 | <b>1,39</b> | 1,26-1,52 | <b>2,55</b> | 2,38-2,72 |
| 2016 | <b>1,42</b> | 1,29-1,55 | <b>2,65</b> | 2,47-2,83 |
| 2017 | <b>1,59</b> | 1,45-1,73 | <b>2,90</b> | 2,71-3,09 |
